# Supplementary material for: Effect of Eicosapentaenoic Acid Supplementation on Murine Preadipocytes 3T3-L1 Cells Activated with Lipopolysaccharide and/or Tumor Necrosis Factor-α
Source: MDPI journal article supplement (doi:10.3390/life11090977), 2021-09-16
Supplement: s1 [file s1]

Supplementary Materials of:

# Effect of Eicosapentaenoic Acid Supplementation on Murine Preadipocytes 3T3-L1 Cells Activated with Lipopolysaccharide and/or Tumor Necrosis Factor- $\alpha$

Anna Zając-Grabiec <sup>1</sup>, Karoline Bartusek <sup>2</sup>, Katarzyna Sroczyńska <sup>1</sup>, Tadeusz Librowski <sup>1</sup> and Joanna Gdula-Argasińska <sup>1,\*</sup>

- <sup>1</sup> Department of Radioligands, Faculty of Pharmacy, Medical College, Jagiellonian University, Medyczna 9, 30-688 Kraków, Poland; anna25.zajac@student.uj.edu.pl (A.Z.-G.); katarzyna91kardas@student.uj.edu.pl (K.S.); mflibrow@cyf-kr.edu.pl (T.L.)  
<sup>2</sup> Faculty of Pharmacy, Rheinische Friedrich-Wilhelms University of Bonn, An der Immenburg 4, 53121 Bonn, Germany; karolinebartusek@yahoo.de  
\* Correspondence: jargasinska@cm-uj.krakow.pl

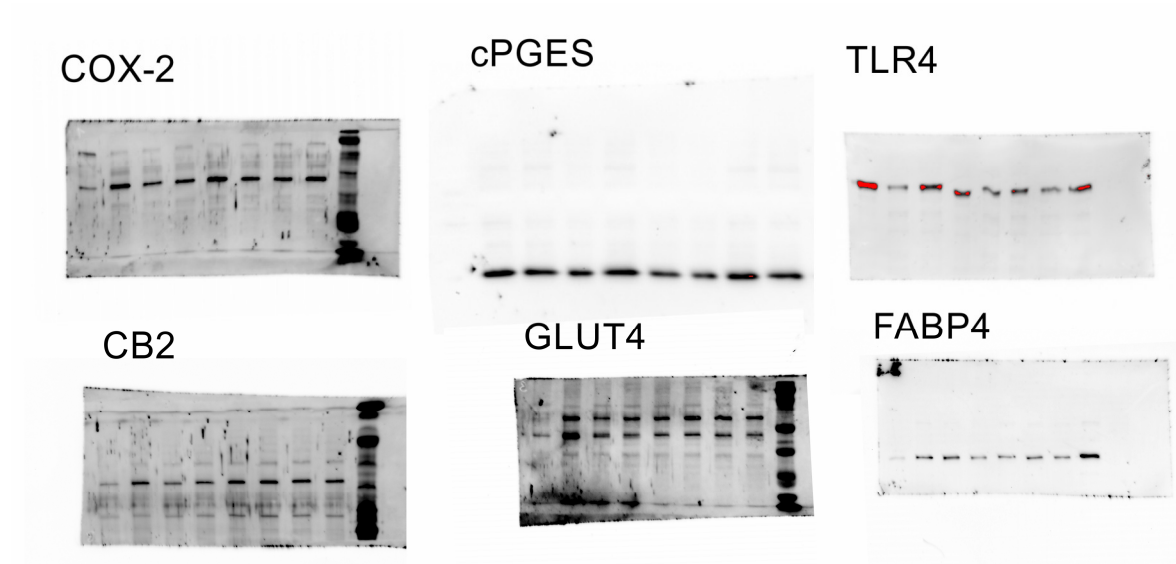

**Figure S1.** Original Western blot figures.
